# Supplementary material for: Twa1/Gid8 is a β-catenin nuclear retention factor in Wnt signaling and colorectal tumorigenesis
Source: PubMed Central journal article supplement (PMC5717399; doi:10.1038/cr.2017.107), 2017-08-22
Supplement: cr2017107x2.pdf [file cr2017107x2.pdf]

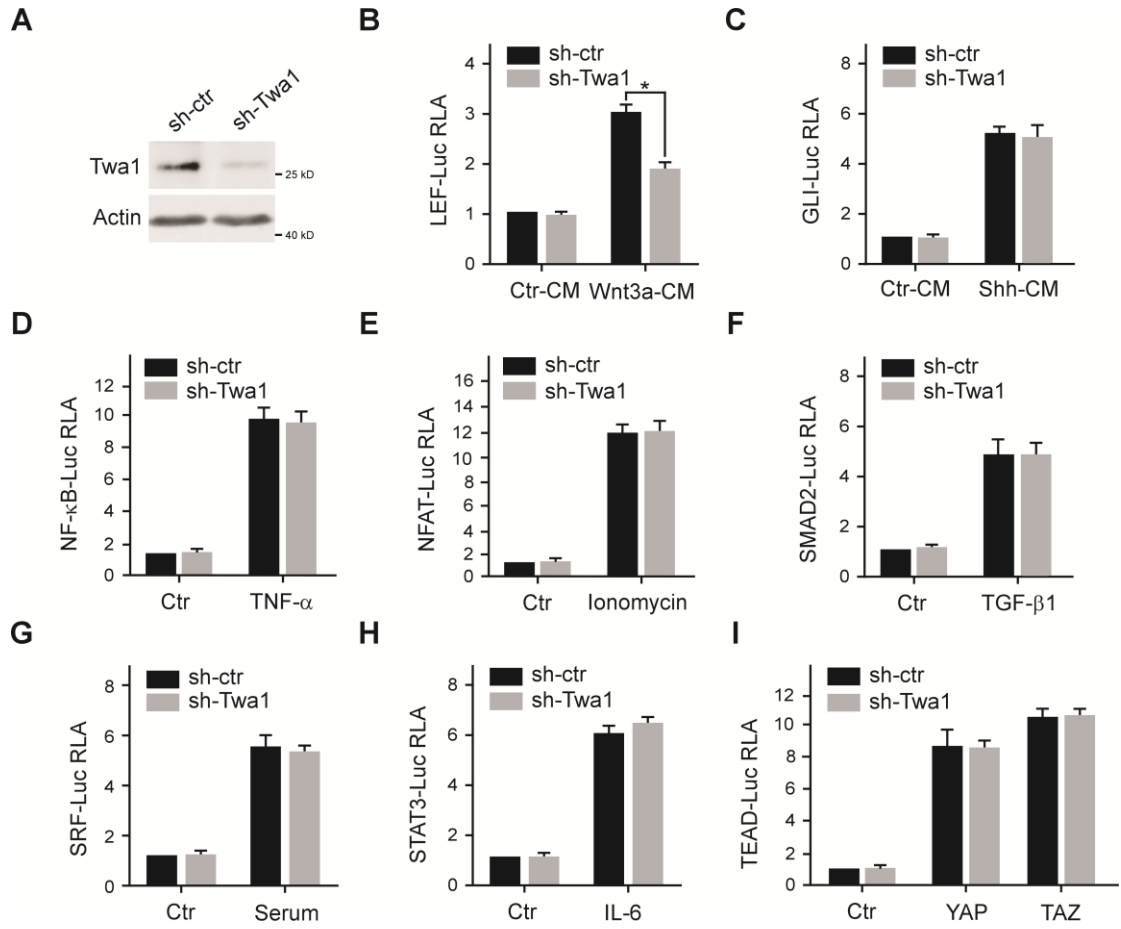

**Supplementary information, Figure S2** Twa1 is selectively involved in canonical Wnt signaling. **(A)** Western analysis showing the efficiency of Twa1 knockdown in HEK-293 cells. The cells were treated with lentivirus-based shRNAs targeting Twa1 (sh-Twa1) or control shRNA (sh-ctr) and subjected to immunoblotting. Actin was used as a loading control. **(B-I)** Effects of Twa1 depletion on the indicated pathways determined by dual luciferase reporter assays. HEK-293 cells infected with lentiviruses containing sh-Twa1 or sh-ctr were transfected with the plasmids containing the indicated reporters, and treated with the indicated signaling pathway activators **(B-H)** or co-transfected with the indicated constructs **(I)**. Quantitative data are expressed as the mean  $\pm$ SEM (at least three independent experiments). \* $P < 0.05$ , Student's *t* test. Ctr, control, GLI, glioma-associated oncogene (Hedgehog signaling); IL-6, interleukin-6; LEF, lymphoid enhancer-binding factor (Wnt/ $\beta$ -catenin signaling); Luc, luciferase; NF- $\kappa$ B, nuclear factor- $\kappa$ B (TNF- $\alpha$  signaling); NFAT, nuclear factor of activated T cells (Calcium signaling); RLA, relative luciferase activity (firefly/renilla luciferase); Shh-CM, sonic hedgehog-conditioned medium; SMAD2, SMAD family member 2 (TGF- $\beta$  signaling); SRF, serum response factor (MAPK signaling); STAT3, signal transducers and activators of transcription 3 (JAK/STAT signaling); TAZ, transcriptional coactivator with PDZ-binding motif; TEAD, TEA domain (Hippo signaling). TGF- $\beta$ 1, transforming growth factor- $\beta$  1; TNF- $\alpha$ , tumor necrosis factor- $\alpha$ ; Wnt3a-CM, Wnt3a-conditioned medium; YAP, Yes-associated protein.
