# Supplementary material for: Twa1/Gid8 is a β-catenin nuclear retention factor in Wnt signaling and colorectal tumorigenesis
Source: PubMed Central journal article supplement (PMC5717399; doi:10.1038/cr.2017.107), 2017-08-22
Supplement: cr2017107x3.pdf [file cr2017107x3.pdf]

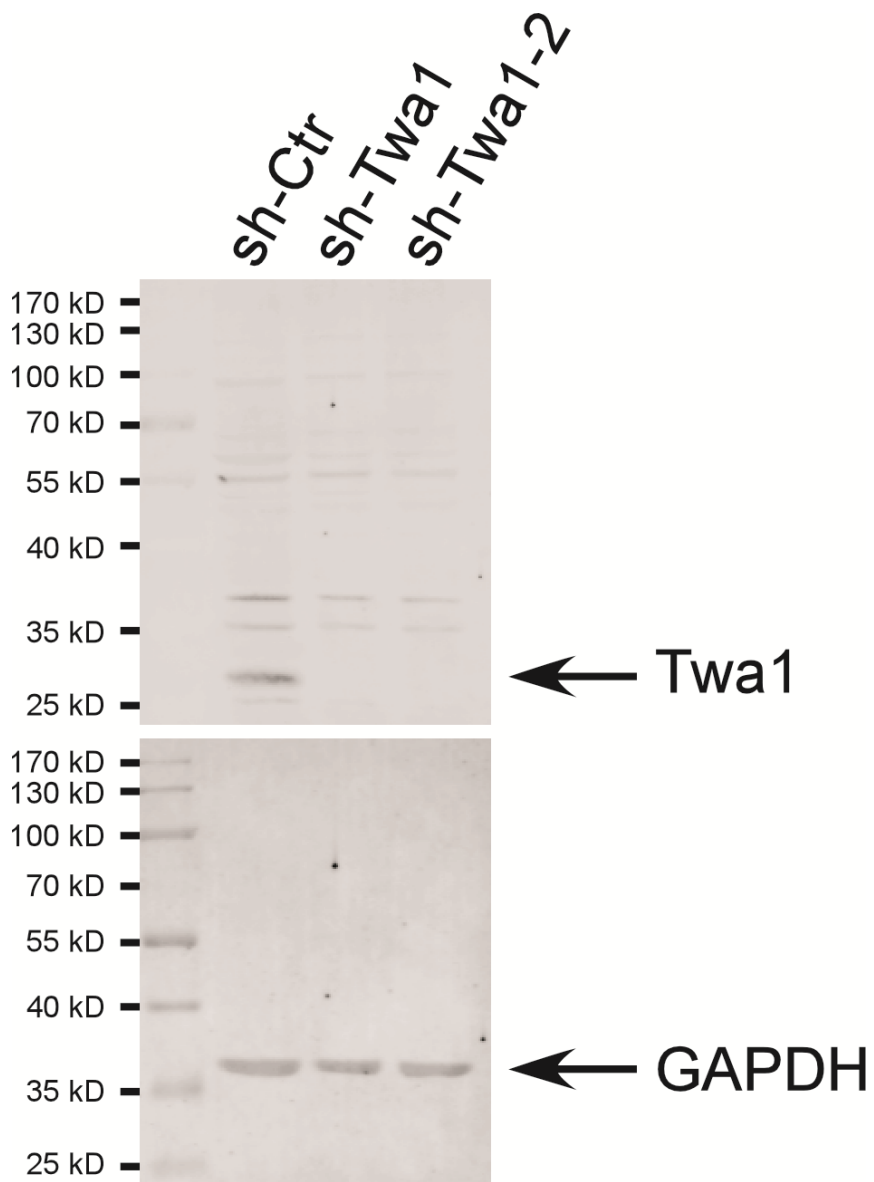

**Supplementary information, Figure S3** Knockdown of *Twa1* reduces the protein levels of endogenous *Twa1* in HEK-293 cells. The cells transfected with lentivirus-based shRNAs targeting different regions of *Twa1* mRNA (sh-*Twa1* and sh-*Twa1*-2) or control shRNA (sh-ctr) were subjected to western blotting with the indicated antibodies (full immunoblot). GAPDH was used as a loading control.
