# Supplementary material for: Twa1/Gid8 is a β-catenin nuclear retention factor in Wnt signaling and colorectal tumorigenesis
Source: PubMed Central journal article supplement (PMC5717399; doi:10.1038/cr.2017.107), 2017-08-22
Supplement: cr2017107x4.pdf [file cr2017107x4.pdf]

**A**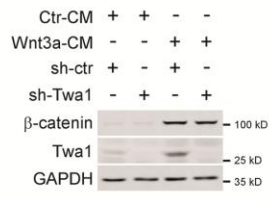**B**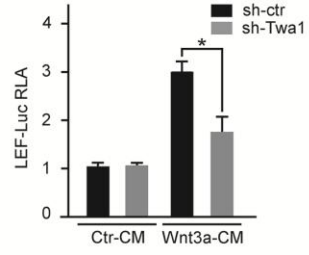**C**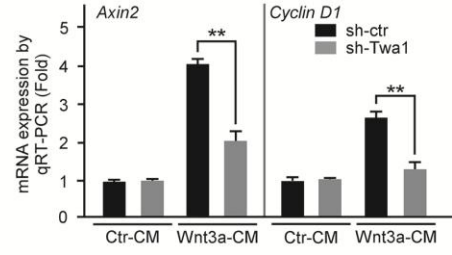**D**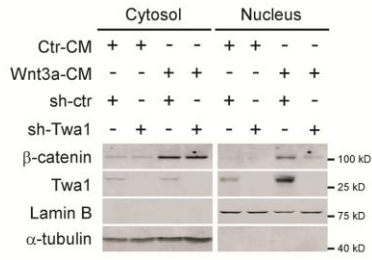**E**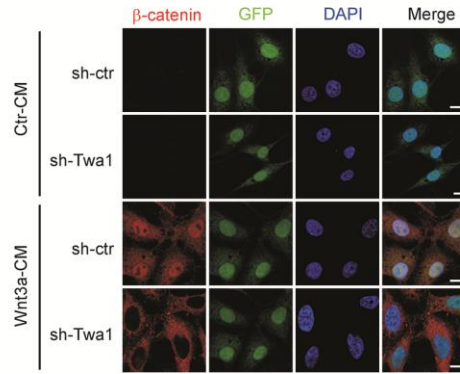

**Supplementary information, Figure S4** Twa1 facilitates  $\beta$ -catenin nuclear accumulation and Wnt target gene expression in RKO cells. RKO cells infected with lentiviruses containing sh-Twa1 or sh-ctr were treated with Wnt3a-CM or Ctr-CM, and then subjected to the following experiments. **(A)** Western analysis of endogenous  $\beta$ -catenin and Twa1 from RKO cell lysates. GAPDH was used as a loading control. **(B, C)** Effects of Twa1 depletion on Wnt-induced luciferase reporter activity **(B)** and Wnt target gene expression by qRT-PCR **(C)**. Quantitative data are shown as the mean  $\pm$ SEM (at least three independent experiments). \* $P < 0.05$  and \*\* $P < 0.01$ , Student's  $t$  test. **(D)** Western blotting of endogenous  $\beta$ -catenin and Twa1 from cytosolic and nuclear fractions of HEK-293 cells. Lamin B and  $\alpha$ -tubulin were used as loading controls for nuclear and cytoplasmic fractions, respectively. **(E)** Confocal microscopy showing the nuclear localization of  $\beta$ -catenin. Green signals indicate the cells infected with lentiviruses. DNA was stained with DAPI (blue). Bars, 10  $\mu$ m.
