# Supplementary material for: Twa1/Gid8 is a β-catenin nuclear retention factor in Wnt signaling and colorectal tumorigenesis
Source: PubMed Central journal article supplement (PMC5717399; doi:10.1038/cr.2017.107), 2017-08-22
Supplement: cr2017107x5.pdf [file cr2017107x5.pdf]

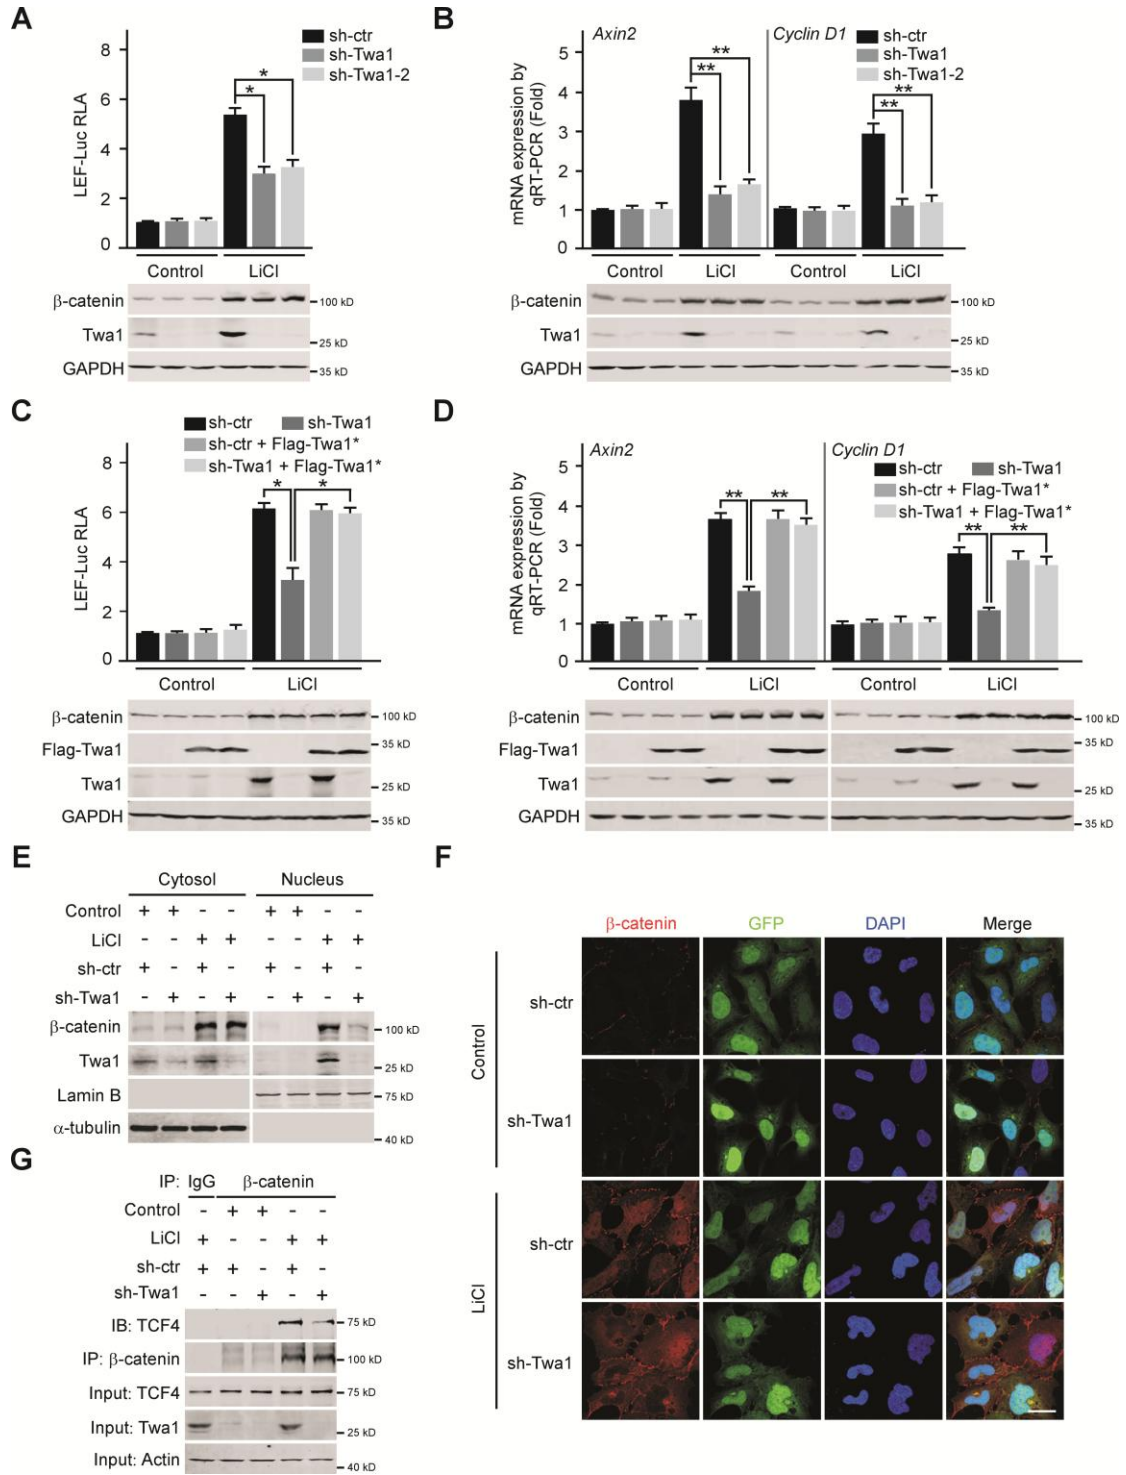

**Supplementary information, Figure S5** Twa1 promotes  $\beta$ -catenin nuclear accumulation and Wnt target gene expression in response to LiCl treatment. HEK-293 cells infected with lentiviruses containing sh-Twa1, sh-Twa1-2 or sh-ctr were transfected with an RNAi-resistant human Twa1 (Twa1\*) construct or not. The cells were then treated with LiCl (40 mM) or not, and subjected to the following experiments. **(A-D)** Effect of Twa1 depletion on LiCl-induced luciferase reporter activity **(A, C)** and Wnt target gene expression by qRT-PCR **(B, D)**. Quantitative data are shown as the mean  $\pm$  SEM (at least three independent experiments). \* $P < 0.05$  and \*\* $P < 0.01$ , Student's  $t$  test. **(E)** Western blotting of endogenous  $\beta$ -catenin and Twa1 from cytosolic and nuclear fractions of HEK-293 cells. Lamin B and  $\alpha$ -tubulin were used as loading controls for nuclear and cytoplasmic fractions, respectively. **(F)** Confocal microscopy showing the nuclear localization of  $\beta$ -catenin. Green signals indicate the cells infected with lentiviruses. DNA was stained with DAPI (blue). Bars, 10  $\mu$ m. **(G)** Western analysis of the indicated proteins co-immunoprecipitated by anti- $\beta$ -catenin antibody in HEK-293 cells. IB, immunoblotting; IP, immunoprecipitation.
