# Supplementary material for: Twa1/Gid8 is a β-catenin nuclear retention factor in Wnt signaling and colorectal tumorigenesis
Source: PubMed Central journal article supplement (PMC5717399; doi:10.1038/cr.2017.107), 2017-08-22
Supplement: cr2017107x7.pdf [file cr2017107x7.pdf]

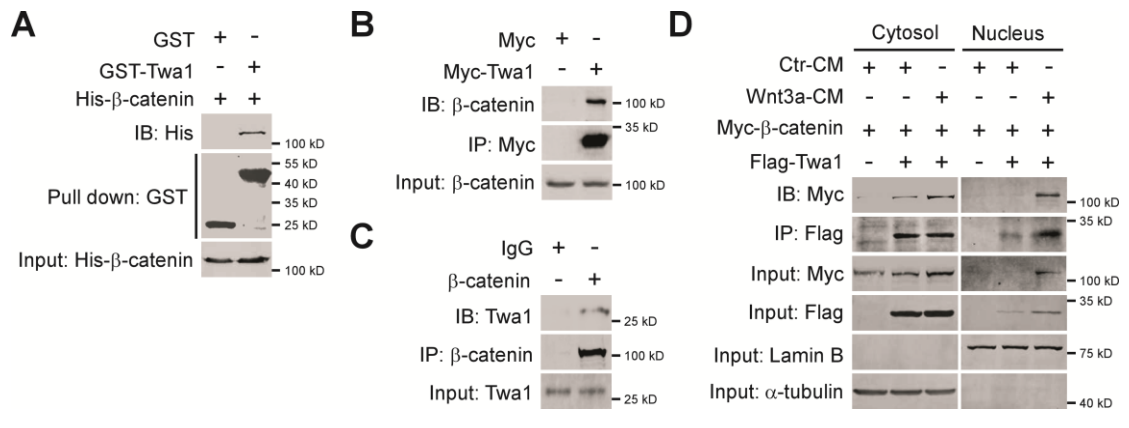

**Supplementary information, Figure S7** Twa1 binds to  $\beta$ -catenin *in vitro* and *in vivo*. **(A)** GST pull-down analysis of purified His- $\beta$ -catenin and GST-Twa1 proteins *in vitro*. **(B, C)** HEK-293 cells transfected with the indicated plasmids **(B)** or not **(C)** were subjected to co-IP analysis with the indicated antibodies. **(D)** Cytosolic or nuclear extracts from HEK-293 cells transfected with the indicated constructs and treated with Wnt3a-CM or Ctr-CM were subjected to co-IP experiments with anti-Flag antibody. Lamin B and  $\alpha$ -tubulin were used as loading controls for nuclear and cytoplasmic fractions, respectively.
