# Supplementary material for: Twa1/Gid8 is a β-catenin nuclear retention factor in Wnt signaling and colorectal tumorigenesis
Source: PubMed Central journal article supplement (PMC5717399; doi:10.1038/cr.2017.107), 2017-08-22
Supplement: cr2017107x8.pdf [file cr2017107x8.pdf]

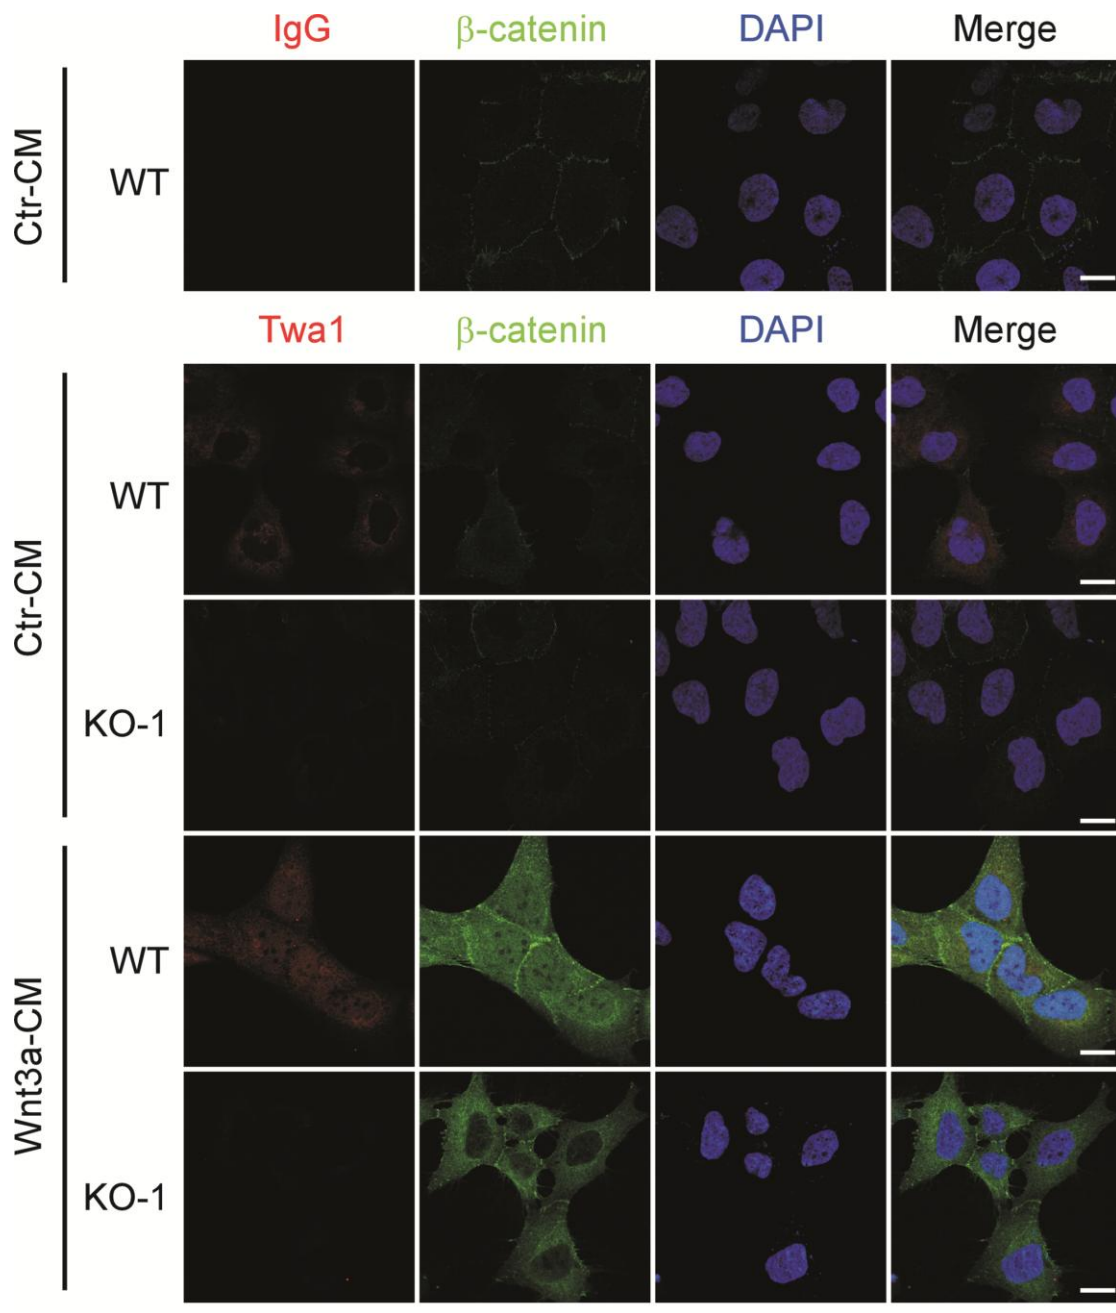

HEK-293 cells

**Supplementary information, Figure S8** Subcellular localization of endogenous *Twa1* in HEK-293 cells. Wild-type and *Twa1* knockout cells were treated with Wnt3a-CM or Ctr-CM, and then subjected to immunostaining with the indicated antibodies or rabbit IgG. DNA was stained with DAPI (blue). Bars, 10  $\mu$ m.
