# Supplementary material for: Twa1/Gid8 is a β-catenin nuclear retention factor in Wnt signaling and colorectal tumorigenesis
Source: PubMed Central journal article supplement (PMC5717399; doi:10.1038/cr.2017.107), 2017-08-22
Supplement: cr2017107x12.pdf [file cr2017107x12.pdf]

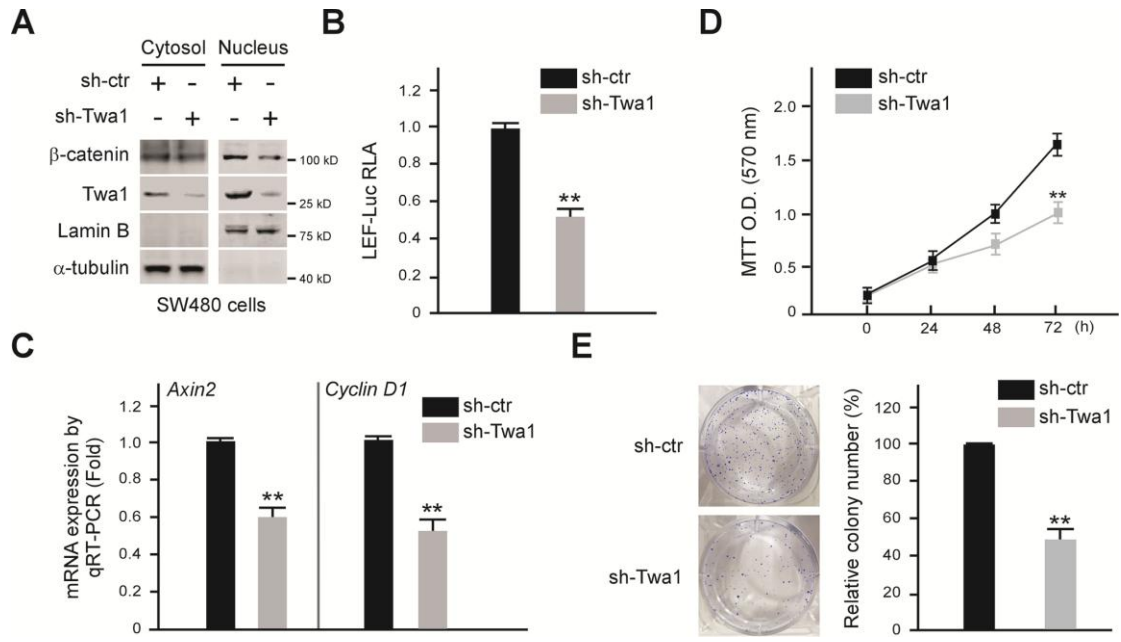

**Supplementary information, Figure S12** Depletion of Twa1 inhibits Wnt activation and cell proliferation in SW480 cells. (A-E) SW480 cells infected with lentiviruses containing sh-Twa1 or sh-ctr were subjected to western blotting (A), dual luciferase reporter activity (B), Wnt target gene expression (C), MTT (D) and colony formation analyses (E). Lamin B and  $\alpha$ -tubulin were used as loading controls for nuclear and cytosolic fractions, respectively. Quantitative data are expressed as the mean  $\pm$ SEM (at least three independent experiments).  $**P < 0.01$ , Student's *t* test.
