# Supplementary material for: Twa1/Gid8 is a β-catenin nuclear retention factor in Wnt signaling and colorectal tumorigenesis
Source: PubMed Central journal article supplement (PMC5717399; doi:10.1038/cr.2017.107), 2017-08-22
Supplement: cr2017107x14.pdf [file cr2017107x14.pdf]

Relationship between nuclear Twa1 levels and clinicopathologic features in CRC patients

| Clinical characteristic | Nuclear Twa1 expression |                | $\chi^2$ | <i>P</i> |
|-------------------------|-------------------------|----------------|----------|----------|
|                         | Upregulation            | Downregulation |          |          |
| Sex                     |                         |                |          |          |
| Male                    | 40                      | 22             | 0.796    | 0.372    |
| Female                  | 32                      | 12             |          |          |
| Age (y)                 |                         |                |          |          |
| < 60                    | 23                      | 11             | 0.002    | 0.967    |
| ≥ 60                    | 49                      | 23             |          |          |
| Differentiation grade   |                         |                |          |          |
| Well                    | 14                      | 2              | 3.348    | 0.188    |
| Moderate                | 48                      | 26             |          |          |
| Poor                    | 10                      | 6              |          |          |
| Infiltration depth      |                         |                |          |          |
| T1                      | 1                       | 8              | 15.253   | 0.002    |
| T2                      | 9                       | 5              |          |          |
| T3                      | 20                      | 6              |          |          |
| T4                      | 42                      | 15             |          |          |
| Lymph node metastasis   |                         |                |          |          |
| N0                      | 34                      | 25             | 7.559    | 0.023    |
| N1                      | 26                      | 8              |          |          |
| N2                      | 12                      | 1              |          |          |
| Distant metastasis      |                         |                |          |          |
| M0                      | 71                      | 34             | 0.477    | 0.490    |
| M1                      | 1                       | 0              |          |          |
| Clinical stage          |                         |                |          |          |
| I                       | 8                       | 10             | 6.526    | 0.089    |
| II                      | 25                      | 12             |          |          |
| III                     | 38                      | 12             |          |          |
| IV                      | 1                       | 0              |          |          |

Note: The statistical significance was determined by  $\chi^2$  test. *P* < 0.05 is considered significant. Differentiation grade, infiltration depth, lymph node metastasis, distant metastasis and clinical stage (TNM) were independently evaluated by at least two professional pathologists.

**Supplementary information, Figure S14** Relationship between nuclear Twa1 levels and clinicopathologic features in CRC patients.
